# Supplementary material for: Development and Validation of the Hospital Security Personnel Narrative Competency Scale (HSPNCS)
Source: Research Square preprint supplement (doi:10.21203/rs.3.rs-7476285/v1), 2025-09-23
Supplement: Supplementary file 1 [file a9f1c54b58e3aa1d02faa9c4.docx]

**Security Personnel Narrative Ability Surve 编号【 】**

Dear security colleagues,
Every person has emotions. We face pressure and happiness in work and life, and we may experience joy or conflict when interacting with others. During these moments, we all have our own thoughts. To better understand your thoughts and behaviors, we are conducting a survey on the narrative ability of security personnel. We warmly welcome you to participate. It is expected that you will be asked to fill out the questionnaire 2–3 times, with each session taking about 6–10 minutes. This survey may include questions about personal and family privacy, which are necessary for data collection in this research. All information will be kept strictly confidential, so please do not have any concerns. There are no right or wrong answers—please respond based on your true feelings. Thank you for your careful participation and support!

Narrative Ability Research Group for Security Personnel, Zhejiang Cancer Hospital

**Narrative Ability Survey**

For the following questions, please choose the most appropriate level from "Completely Disagree" to "Completely Agree" and mark "√". Please do not skip or select multiple answers to avoid invalidating the questionnaire. Thank you for your cooperation.

| **Content** | **Completely Disagree** | **Disagree** | **Neutral** | **Agree** | **Completely Agree** |
| --- | --- | --- | --- | --- | --- |
| 1. I often think about my own thoughts. |  |  |  |  |  |
| 2. I often reflect on my own thoughts. |  |  |  |  |  |
| 3. I often recall my feelings. |  |  |  |  |  |
| 4. I find it interesting to think about my own thoughts |  |  |  |  |  |
| 5. It is important for me to understand where my thoughts come from. |  |  |  |  |  |
| 6. I value understanding my own feelings. |  |  |  |  |  |
| 7. Before making decisions, I consider issues from different perspectives. |  |  |  |  |  |
| 8. I look at problems from different viewpoints and positions. |  |  |  |  |  | |
| 9. Sometimes I try to see things from others' perspectives to understand them better. |  |  |  |  |  | |
| 10. When someone makes me angry, I usually try to see things from their point of view. |  |  |  |  |  | |
| **Content** | **Completely Disagree** | **Disagree** | **Neutral** | **Agree** | **Completely Agree** | |
| 11. Sometimes I can’t help getting angry at others, but then I think: if I were them, how would I feel? |  |  |  |  |  | |
| 12. When reading novels, watching movies, or short videos (such as those on TikTok or Kuaishou), I immerse myself in the emotional world of the characters. |  |  |  |  |  | |
| 13. When reading novels, watching movies, or short videos, I usually become fully absorbed. |  |  |  |  |  | |
| 14. After reading a novel or watching a movie or short video, I feel as if I were one of the characters. |  |  |  |  |  | |
| 15. When reading novels, watching movies, or short videos, I easily put myself in a character’s position to experience their feelings. |  |  |  |  |  | |
| 16.When reading novels, watching movies, or short videos, I think: if this story happened to me, what would I do? |  |  |  |  |  | |
| 17. When I see people in unfortunate situations, I often feel softhearted and want to help them. |  |  |  |  |  | |
| 18. When I see others facing difficulties or problems, I feel sad for them. |  |  |  |  |  | |
| 19. When I see others being hurt, I want to protect them. |  |  |  |  |  | |
| 20. I care about others’ situations. |  |  |  |  |  | |
| 21. When I see others being treated unfairly, I feel sympathy for them. |  |  |  |  |  | |
| 22. In emergencies, I feel worried and scared and find it hard to stay calm. |  |  |  |  |  | |
| 23. When I am very emotional, I often don’t know what to do. |  |  |  |  |  | |
| 24. In tense situations, I feel panicked and scared. |  |  |  |  |  | |
| **Content** | **Completely Disagree** | **Disagree** | **Neutral** | **Agree** | **Completely Agree** | |
| 25. In an emergency, I get so nervous that I can hardly control myself. |  |  |  |  |  | |
| 26. When I see others in accidents and in urgent need of help, I become very nervous. |  |  |  |  |  | |
| 27. I am doing a job that helps people. |  |  |  |  |  | |
| 28. I believe working as a security guard contributes to society. |  |  |  |  |  | |
| 29. I care about whether being a security guard can help society and others. |  |  |  |  |  | |
| 30. I want to do something helpful for society through my job as a security guard. |  |  |  |  |  | |
| 31. I feel an invisible force pushing me to work as a security guard |  |  |  |  |  | |
| 32. I was called by some kind of force to choose this job as a security guard. |  |  |  |  |  | |
| 33. I feel I will always pursue the job I want. |  |  |  |  |  | |
| 34. I feel I am meant to be a security guard. |  |  |  |  |  | |
| 35. I want to find my own value through working as a security guard. |  |  |  |  |  | |
| 36. I want to find a job that makes me feel valued. |  |  |  |  |  | |

**基本信息**

37. Your gender:

A Male B Female

38. Your age: ______

39. Your years of work experience: ______ years

40. Your highest education level:

A Junior high school or below B High school or vocational school C College D Bachelor’s degree or higher

41. Your marital status:

A Unmarried B Married C Divorced D Other (e.g., widowed)

42. Your children status:

A No children B One child C Two or more children

43. Do you have siblings:

A Yes B No

44. Your current living situation:

A Living in a dormitory B Living with family C Living alone

45. Did you have other work experience before becoming a security guard:

A Yes B No

46. Besides working as a security guard at this organization, do you have a part-time job elsewhere:

A Yes B No
